# Supplementary material
Source: ML conference proceedings conference paper supplement (https://openreview.net/forum?id=zfMtM7HZGLT)
Supplement: supplementary_material [file attachment]

## 2 A Reproducibility Checklist

3 To ensure that all results are easily reproducible, we use the reproducibility framework, the Machine  
4 Learning Reproducibility Checklist version 1.2, Mar.27 2019.

- 5 1. For all **models** and **algorithms** presented,
  - 6 (a) **A clear description of the mathematical setting, algorithm, and/or model.**
  - 7 (b) **An analysis of the complexity (time, space, sample size) of any algorithm.**  
8 We analyse the complexity of the proposed methods in Table 2.
  - 9 (c) **A link to a downloadable source code, with specification of all dependencies, in-**  
10 **cluding external libraries.**  
11 We provide a downloadable source code, with specification of all dependencies, includ-  
12 ing external libraries. See <https://github.com/MinghuiChen43/CIL-ReID>.
- 13 2. For any **theoretical claim**,
  - 14 (a) **A statement of the result.**  
15 We do not make theoretical claim.
  - 16 (b) **A clear explanation of any assumptions.**  
17 We do not make theoretical claim.
  - 18 (c) **A complete proof of the claim.**  
19 We do not make theoretical claim.
- 20 3. For all **figures** and **tables** that present empirical results,
  - 21 (a) **A complete description of the data collection process, including sample size.**  
22 We do not collect new dataset.
  - 23 (b) **A link to downloadable version of the dataset or simulation environment.**  
24 We do not collect new dataset and create new simulation environment.
  - 25 (c) **An explanation of any data that were excluded, description of any pre-processing**  
26 **step.**  
27 We did not exclude any data. The pre-processing steps for evaluating corruption  
28 robustness are described in Appendix.
  - 29 (d) **An explanation of how samples were allocated for training/ validation/ testing.**  
30 We provide detailed allocation of training/ validation/ testing in Appendix.
  - 31 (e) **The range of hyper-parameters considered, method to select the best hyper-**  
32 **parameter configuration, and specification of all hyper-parameters used to gen-**  
33 **erate results.**  
34 We provide detailed settings of selecting hyper-parameter in Appendix.
  - 35 (f) **The exact number of evaluation runs.**  
36 Ten evaluation runs are conducted for the experiments on Market-1501, DukeMTMC,  
37 CUHK03 (detected), SYSU-MM01 and RegDB datasets. Three evaluation runs are  
38 conducted for the experiments on MSMT17 dataset.
  - 39 (g) **A description of how experiments were run.**  
40 We provide a description of how experiments were run in Appendix.
  - 41 (h) **A clear definition of the specific measure of statistics used to report results.**  
42 We use CMC (cumulative match characteristic), mAP (mean average precision), and  
43 mINP (mean inverse negative penalty) to evaluate the performance of a ReID system.  
44 The definition of mINP is described in Sec 3.1.
  - 45 (i) **Clearly defined error bars.**
  - 46 (j) **A description of results with central tendency (e.g. mean) & variation (e.g. std-**  
47 **dev).**  
48 We report mean for all experiments. And additionally, we report standard deviation for  
49 the proposed baseline in Appendix.
  - 50 (k) **A description of the computing infrastructure used.**  
51 We present the description of the computing infrastructure used in Appendix.

Table 1: Details of the investigated methods.

| Method                       | abbreviation | backbone  | evaluated datasets                                       | source code                                                                                                                         |
|------------------------------|--------------|-----------|----------------------------------------------------------|-------------------------------------------------------------------------------------------------------------------------------------|
| Hao Luo et al. (2019)        | BoT          | ResNet-50 | Market-1501, DukeMTMC, CUHK03, MSMT-17                   | <a href="https://github.com/michuanhaohao/reid-strong-baseline">https://github.com/michuanhaohao/reid-strong-baseline</a>           |
| Mang Ye et al. (2020)        | AGW          | ResNet-50 | Market-1501, DukeMTMC, CUHK03, MSMT-17, SYSU-MM01, RegDB | <a href="https://github.com/mangye16/ReID-Survey">https://github.com/mangye16/ReID-Survey</a>                                       |
| Shuting He et al. (2021)     | TransReID    | ViT       | Market-1501, DukeMTMC, CUHK03, MSMT-17                   | <a href="https://github.com/heshuting555/TransReID">https://github.com/heshuting555/TransReID</a>                                   |
| Tianlong Chen et al. (2019)  | ABD-Net      | ResNet-50 | Market-1501, DukeMTMC, MSMT17                            | <a href="https://github.com/VITA-Group/ABD-Net">https://github.com/VITA-Group/ABD-Net</a>                                           |
| Binghui Chen et al. (2019)   | MHN          | ResNet-50 | Market-1501, DukeMTMC                                    | <a href="https://github.com/chenbinghui1/MHN">https://github.com/chenbinghui1/MHN</a>                                               |
| Kaiyang Zhou et al. (2019)   | OS-Net       | OS-Net    | Market-1501, DukeMTMC, CUHK03, MSMT17                    | <a href="https://github.com/KaiyangZhou/deep-person-reid">https://github.com/KaiyangZhou/deep-person-reid</a>                       |
| Ben Xie et al. (2020)        | PLR-OS       | OS-Net    | Market-1501, DukeMTMC, CUHK03                            | <a href="https://github.com/AI-NERC-NUPT/PLR-OSNet">https://github.com/AI-NERC-NUPT/PLR-OSNet</a>                                   |
| Fabian Herzog et al. (2021)  | LightMBN     | OS-Net    | Market-1501, CUHK03                                      | <a href="https://github.com/jixunbo/LightMBN">https://github.com/jixunbo/LightMBN</a>                                               |
| Yifan Sun et al.(2017)       | PCB          | ResNet-50 | Market-1501, DukeMTMC, CUHK03                            | <a href="https://github.com/syfafterzy/PCB_RPP_for_reID">https://github.com/syfafterzy/PCB_RPP_for_reID</a>                         |
| Guanshuo Wang et al.(2018)   | MGN          | ResNet-50 | Market-1501, DukeMTMC, CUHK03                            | <a href="https://github.com/seathiefwang/MGN-pytorch">https://github.com/seathiefwang/MGN-pytorch</a>                               |
| Hao Luo et al. (2019)        | Aligned++    | ResNet-50 | Market-1501, DukeMTMC, CUHK03, MSMT17                    | <a href="https://github.com/michuanhaohao/AlignedReID">https://github.com/michuanhaohao/AlignedReID</a>                             |
| Hyunjong Park et al. (2019)  | RRID         | ResNet-50 | Market-1501, DukeMTMC, CUHK03                            | <a href="https://github.com/cvlab-yonsei/RRID">https://github.com/cvlab-yonsei/RRID</a>                                             |
| Feng Zheng et al. (2018)     | Pyramid      | ResNet-50 | Market-1501, DukeMTMC, CUHK03                            | <a href="https://github.com/TencentYoutuResearch/PersonReID-Pyramid">https://github.com/TencentYoutuResearch/PersonReID-Pyramid</a> |
| Fufu Yu et al. (2020)        | Cace-Net     | ResNet-50 | Market-1501, DukeMTMC, MSMT17                            | <a href="https://github.com/TencentYoutuResearch/PersonReID-CACENET">https://github.com/TencentYoutuResearch/PersonReID-CACENET</a> |
| Hao Luo et al. (2019)        | BoT          | ResNet-50 | Market-1501, DukeMTMC                                    | <a href="https://github.com/michuanhaohao/reid-strong-baseline">https://github.com/michuanhaohao/reid-strong-baseline</a>           |
| Dengpan Fu et al. (2020)     | LUPerson     | ResNet-50 | Market-1501, DukeMTMC, CUHK03, MSMT17                    | <a href="https://github.com/DengpanFu/LUPerson">https://github.com/DengpanFu/LUPerson</a>                                           |
| Zuozhuo Dai et al. (2018)    | BDB          | ResNet-50 | Market-1501, DukeMTMC, CUHK03                            | <a href="https://github.com/daizuoazhuo/batch-dropblock-network">https://github.com/daizuoazhuo/batch-dropblock-network</a>         |
| Zhedong Zheng et al. (2019)  | DG-Net       | ResNet-50 | Market-1501, DukeMTMC, CUHK03, MSMT17                    | <a href="https://github.com/NVlabs/DG-Net">https://github.com/NVlabs/DG-Net</a>                                                     |
| Rodolfo Quispe et al. (2020) | TDB          | ResNet-50 | Market-1501, DukeMTMC, CUHK03                            | <a href="https://github.com/RQuispeC/top-dropblock">https://github.com/RQuispeC/top-dropblock</a>                                   |
| Yunpeng Gong et al. (2021)   | LGPR, F-LGPR | ResNet-50 | Market-1501, DukeMTMC, MSMT17                            | <a href="https://github.com/finger-monkey/ReID_Adversarial_Defense">https://github.com/finger-monkey/ReID_Adversarial_Defense</a>   |

## 52 B Implementation Details

53 We conduct experiments on single-modality datasets Market-1501, CUHK03 (detected) and MSMT17,  
54 and cross-modality datasets SYSU-MM01 and RegDB. Tab. 1, we list the the methods we investigated  
55 and links of source codes we used. All the experiments are conducted on single 32G Tesla V100  
56 GPU. Detailed experimental settings are provided on [https://github.com/MinghuiChen43/](https://github.com/MinghuiChen43/CIL-ReID)  
57 CIL-ReID.

Table 2: Robustness evaluation under different corruption severity levels.

| Severity | mINP         | mAP          | Rank-1       |
|----------|--------------|--------------|--------------|
| level-0  | 57.90 (0.00) | 84.04 (0.00) | 93.38 (0.00) |
| level-1  | 15.74 (0.44) | 57.05 (0.30) | 80.81 (0.40) |
| level-2  | 5.21 (0.22)  | 39.97 (0.40) | 69.09 (0.76) |
| level-3  | 2.84 (0.17)  | 30.33 (0.21) | 59.41 (0.77) |
| level-4  | 0.86 (0.06)  | 17.22 (0.33) | 43.40 (0.64) |
| level-5  | 0.35 (0.05)  | 9.60 (0.23)  | 30.10 (0.71) |

Table 3: Robustness evaluation under different corruption types.

| type    |                  | mINP         | mAP          | Rank-1       |
|---------|------------------|--------------|--------------|--------------|
| Noise   | Gaussian         | 4.34 (0.07)  | 31.40 (0.42) | 57.65 (0.72) |
|         | shot             | 4.35 (0.12)  | 31.15 (0.21) | 57.62 (0.35) |
|         | impulse          | 6.20 (0.13)  | 37.30 (0.36) | 64.10 (0.31) |
|         | speckle          | 14.30 (0.11) | 48.87 (0.22) | 73.64 (1.03) |
| Blur    | defocus          | 15.06 (0.35) | 49.57 (0.41) | 73.32 (0.96) |
|         | glass            | 26.02 (0.48) | 60.85 (0.22) | 80.56 (0.17) |
|         | motion           | 19.42 (0.15) | 55.87 (0.19) | 77.45 (0.18) |
|         | zoom             | 38.06 (0.27) | 71.79 (0.01) | 87.52 (0.36) |
|         | Gaussian         | 15.48 (0.55) | 52.20 (0.24) | 75.97 (0.33) |
| Weather | snow             | 11.94 (0.29) | 44.98 (0.16) | 68.66 (0.58) |
|         | frost            | 3.86 (0.10)  | 29.36 (0.23) | 56.71 (0.36) |
|         | fog              | 3.10 (0.05)  | 24.78 (0.04) | 48.97 (0.67) |
|         | brightness       | 23.34 (0.28) | 61.18 (0.04) | 82.14 (0.43) |
|         | spatter          | 24.25 (0.56) | 62.12 (0.51) | 82.73 (0.38) |
|         | rain             | 15.54 (0.15) | 50.20 (0.40) | 73.47 (0.49) |
| Digital | contrast         | 0.70 (0.06)  | 19.29 (0.06) | 45.10 (0.57) |
|         | elastic          | 16.30 (0.09) | 47.95 (0.08) | 70.70 (0.21) |
|         | pixel            | 30.06 (0.03) | 66.00 (0.27) | 83.19 (0.13) |
|         | JPEG compression | 15.72 (0.39) | 50.36 (0.24) | 73.81 (0.70) |
|         | saturate         | 0.48 (0.02)  | 18.43 (0.15) | 55.58 (0.37) |

## 58 C More Experimental Results

### 59 C.1 Robustness under different corruption settings

60 Tab. 2 shows the robustness under different corruption severity levels. Tab. 3 shows the robustness  
61 under different corruption types.

### 62 C.2 Detailed Results of the SOTA methods

63 In Tab. 4 and Tab. 5, we present the results of corruption robustness evaluations of the SOTA methods  
64 on datasets Market-1501, CUHK03 (detected), MSMT17, SYSU-MM01 and RegDB respectively.

## 65 D Visualization

66 In Fig. 1, we present more augmented examples under different data augmentation methods.

67 In Fig. 2, we present more comparison examples of activation maps under different data augmentation  
68 training methods.

Table 4: Corruption robustness evaluations of the SOTA methods on datasets Market-1501, CUHK03 (detected) and MSMT17.(Note that Market standards for dataset Market-1501)

| Dataset | Method    | Clean Eval. |       |       |       | Corrupted Eval. |       |       |       | Corrupted Query |       |       |       | Corrupted Gallery |       |       |       |
|---------|-----------|-------------|-------|-------|-------|-----------------|-------|-------|-------|-----------------|-------|-------|-------|-------------------|-------|-------|-------|
|         |           | mINP        | mAP   | R-1   | R-5   | mINP            | mAP   | R-1   | R-5   | mINP            | mAP   | R-1   | R-5   | mINP              | mAP   | R-1   | R-5   |
| Market  | AGW       | 65.40       | 88.10 | 95.00 | 98.20 | 0.30            | 10.80 | 33.40 | 45.80 | 19.10           | 33.40 | 38.70 | 46.80 | 1.00              | 36.00 | 84.10 | 93.70 |
|         | BoT       | 51.00       | 83.90 | 94.30 | 97.80 | 0.10            | 6.60  | 26.20 | 37.90 | 12.90           | 29.10 | 36.70 | 44.70 | 0.30              | 21.70 | 74.30 | 86.30 |
|         | ABD-Net   | 64.72       | 87.94 | 94.98 | 98.37 | 0.26            | 9.81  | 29.65 | 42.49 | 17.81           | 31.10 | 36.02 | 44.15 | 0.60              | 31.32 | 81.38 | 91.89 |
|         | OS-Net    | 56.78       | 85.67 | 94.69 | 98.22 | 0.23            | 10.37 | 30.96 | 44.06 | 15.82           | 31.10 | 36.97 | 45.06 | 0.45              | 29.29 | 79.81 | 90.74 |
|         | DG-Net    | 61.60       | 86.09 | 94.77 | 97.98 | 0.35            | 9.96  | 31.75 | 44.92 | 16.93           | 29.76 | 35.93 | 43.64 | 1.04              | 34.59 | 83.30 | 93.05 |
|         | MHN       | 55.27       | 85.33 | 94.50 | 97.92 | 0.38            | 10.69 | 33.29 | 47.28 | 16.83           | 33.08 | 39.87 | 48.39 | 1.07              | 33.50 | 82.29 | 92.29 |
|         | BDB       | 61.78       | 85.47 | 94.63 | 97.80 | 0.32            | 10.95 | 33.79 | 47.84 | 18.93           | 31.58 | 38.42 | 47.48 | 0.70              | 31.82 | 81.40 | 92.19 |
|         | TransReID | 69.29       | 88.93 | 95.07 | 98.46 | 1.98            | 27.38 | 53.19 | 68.95 | 34.39           | 52.40 | 58.27 | 68.97 | 4.47              | 52.59 | 88.50 | 96.05 |
|         | LGPR      | 58.71       | 86.09 | 94.51 | 98.34 | 0.24            | 8.26  | 27.72 | 38.56 | 15.24           | 29.52 | 35.82 | 42.65 | 0.69              | 32.51 | 82.93 | 92.45 |
|         | F-LGPR    | 65.48       | 88.22 | 95.37 | 98.31 | 0.23            | 9.08  | 29.35 | 40.86 | 17.97           | 31.21 | 36.16 | 43.47 | 0.78              | 33.98 | 83.76 | 93.00 |
|         | TDB       | 56.41       | 85.77 | 94.30 | 98.01 | 0.20            | 8.90  | 28.56 | 41.14 | 14.94           | 29.53 | 34.71 | 43.10 | 0.33              | 25.91 | 79.14 | 90.30 |
|         | LUPerson  | 68.71       | 90.32 | 96.32 | 98.81 | 0.29            | 10.37 | 32.22 | 44.53 | 19.68           | 34.16 | 40.09 | 47.20 | 0.79              | 34.35 | 85.68 | 93.63 |
|         | LightMBN  | 73.29       | 91.54 | 96.53 | 98.84 | 0.50            | 14.84 | 38.68 | 52.30 | 27.09           | 41.81 | 46.33 | 54.56 | 1.41              | 41.38 | 87.98 | 95.31 |
|         | PLR-OS    | 66.42       | 88.93 | 95.19 | 98.40 | 0.48            | 14.23 | 37.56 | 52.17 | 23.30           | 38.75 | 43.49 | 52.68 | 1.25              | 38.98 | 85.15 | 93.94 |
|         | PCB       | 41.97       | 82.19 | 94.15 | 97.74 | 0.41            | 12.72 | 34.93 | 49.88 | 12.66           | 32.35 | 39.72 | 49.30 | 0.85              | 33.03 | 80.89 | 91.55 |
|         | Pyramid   | 61.61       | 87.50 | 94.86 | 98.31 | 0.36            | 12.75 | 35.72 | 50.39 | 19.66           | 35.48 | 41.09 | 49.56 | 0.95              | 34.70 | 81.90 | 92.78 |
|         | Aligned++ | 47.31       | 79.10 | 91.83 | 96.97 | 0.32            | 10.95 | 31.00 | 45.55 | 14.70           | 29.43 | 35.15 | 44.95 | 0.67              | 30.10 | 75.86 | 89.74 |
|         | RRID      | 67.14       | 88.43 | 95.19 | 98.10 | 0.46            | 13.45 | 36.57 | 51.90 | 22.18           | 36.26 | 41.29 | 49.58 | 1.09              | 37.44 | 84.00 | 93.58 |
|         | VPM       | 50.09       | 81.43 | 93.79 | 98.19 | 0.31            | 10.15 | 31.17 | 45.23 | 15.48           | 31.75 | 39.23 | 49.11 | 0.71              | 31.06 | 79.42 | 91.15 |
|         | MGN       | 60.86       | 86.51 | 93.88 | 0.00  | 0.29            | 9.72  | 29.56 | 42.92 | 17.08           | 30.00 | 34.25 | 42.49 | 0.69              | 30.83 | 79.36 | 91.21 |
| CUHK03  | Pyramid   | 61.41       | 73.14 | 79.54 | 93.16 | 1.10            | 8.03  | 10.42 | 17.93 | 20.18           | 26.36 | 28.96 | 44.82 | 4.21              | 26.14 | 30.66 | 45.39 |
|         | MGN       | 51.18       | 62.73 | 69.14 | 88.93 | 0.46            | 4.20  | 5.44  | 10.86 | 10.90           | 14.39 | 15.42 | 28.44 | 1.77              | 15.55 | 18.92 | 32.43 |
|         | Aligned++ | 47.32       | 59.76 | 62.07 | 79.93 | 0.56            | 4.87  | 7.99  | 15.87 | 12.12           | 16.34 | 15.35 | 24.88 | 2.19              | 17.78 | 31.21 | 51.76 |
|         | RRID      | 55.81       | 67.63 | 74.99 | 91.51 | 1.00            | 7.30  | 9.66  | 17.35 | 18.25           | 23.88 | 26.44 | 42.55 | 3.98              | 24.35 | 28.89 | 44.96 |
|         | MHN       | 56.52       | 66.77 | 72.21 | 86.43 | 0.46            | 3.97  | 8.27  | 15.42 | 14.20           | 17.79 | 18.78 | 28.16 | 2.91              | 18.40 | 36.65 | 56.84 |
|         | CaceNet   | 65.22       | 75.13 | 77.64 | 90.43 | 2.09            | 10.62 | 17.04 | 28.93 | 25.50           | 31.59 | 30.99 | 43.17 | 6.43              | 30.78 | 51.49 | 71.69 |
|         | PLR-OS    | 62.72       | 74.67 | 78.14 | 91.14 | 0.89            | 6.49  | 10.99 | 20.22 | 19.61           | 25.96 | 25.91 | 37.41 | 5.03              | 26.37 | 45.41 | 65.92 |
| MSMT17  | OS-Net    | 4.05        | 40.05 | 71.86 | 82.65 | 0.08            | 7.86  | 28.51 | 40.19 | 1.71            | 18.77 | 35.40 | 45.20 | 0.14              | 16.99 | 59.90 | 74.69 |
|         | BoT       | 9.91        | 48.34 | 73.53 | 85.29 | 0.07            | 5.28  | 20.20 | 31.11 | 2.75            | 15.78 | 25.92 | 35.50 | 0.09              | 16.10 | 59.06 | 76.48 |
|         | AGW       | 12.38       | 51.84 | 75.21 | 86.30 | 0.08            | 6.53  | 22.77 | 34.08 | 3.82            | 18.42 | 28.06 | 37.33 | 0.15              | 18.08 | 61.45 | 78.43 |

Table 5: Corruption robustness evaluations of methods on cross-modality datasets SYSU-MM01 and RegDB.

| Dataset   | Method | Mode A      |       |       |       |                 |       |       |       | Mode B      |       |       |       |                 |       |       |       |
|-----------|--------|-------------|-------|-------|-------|-----------------|-------|-------|-------|-------------|-------|-------|-------|-----------------|-------|-------|-------|
|           |        | Clean Eval. |       |       |       | Corrupted Eval. |       |       |       | Clean Eval. |       |       |       | Corrupted Eval. |       |       |       |
|           |        | mINP        | mAP   | R-1   | R-5   | mINP            | mAP   | R-1   | R-5   | mINP        | mAP   | R-1   | R-5   | mINP            | mAP   | R-1   | R-5   |
| SYSU-MM01 | AGW    | 36.17       | 47.65 | 47.50 | 74.68 | 14.73           | 29.99 | 34.42 | 62.26 | 59.74       | 62.97 | 54.17 | 83.50 | 35.39           | 40.98 | 33.80 | 61.61 |
|           | DGTL   | 42.55       | 55.82 | 57.78 | 83.00 | 18.43           | 35.59 | 41.36 | 68.46 | 65.40       | 69.40 | 62.99 | 87.70 | 41.15           | 47.90 | 42.22 | 69.98 |
|           | HCTL   | 42.14       | 57.65 | 61.94 | 85.85 | 13.85           | 33.15 | 42.38 | 68.87 | 63.69       | 68.41 | 63.70 | 85.66 | 33.29           | 40.61 | 37.26 | 59.54 |
| RegDB     | AGW    | 54.10       | 68.82 | 75.78 | 85.24 | 32.88           | 43.09 | 45.44 | 55.26 | 52.40       | 68.15 | 75.29 | 83.74 | 6.00            | 41.37 | 67.54 | 81.23 |
|           | DGTL   | 61.15       | 75.63 | 85.00 | 91.21 | 37.02           | 48.35 | 53.50 | 62.02 | 55.90       | 73.39 | 82.67 | 89.37 | 6.21            | 46.29 | 75.20 | 87.54 |
|           | HCTL   | 68.15       | 82.46 | 90.63 | 94.66 | 43.77           | 55.83 | 62.09 | 67.78 | 66.50       | 81.05 | 89.17 | 94.27 | 6.80            | 53.79 | 83.63 | 92.82 |



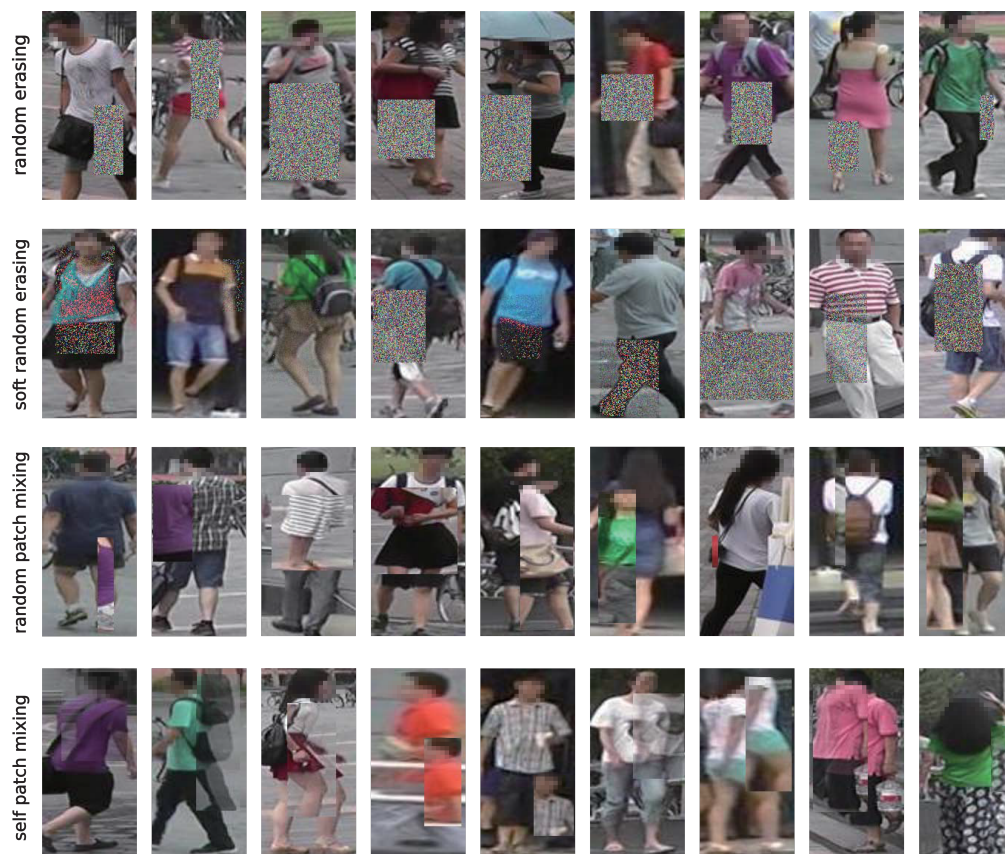

Figure 1: Visualization of different augmented examples.

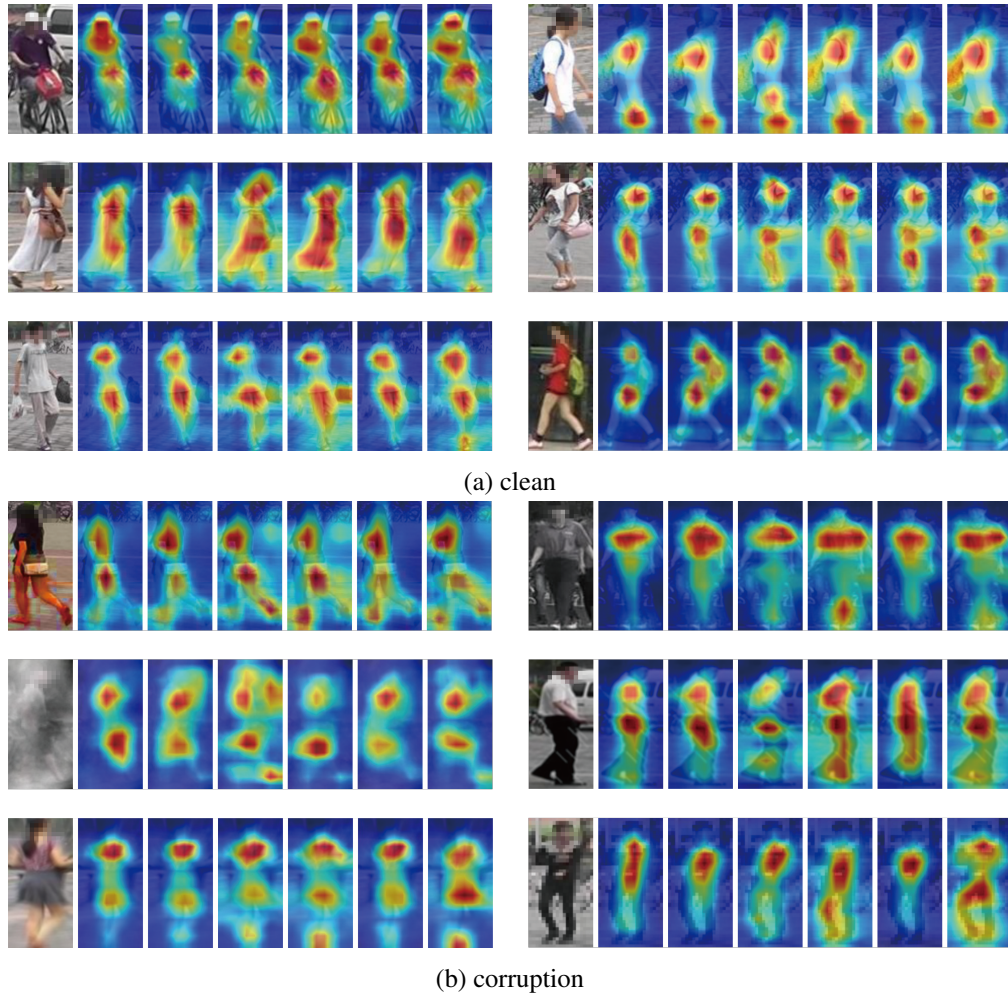

Figure 2: Visualization of activation maps. Each septet contains, from left to right, original image, activation maps from the standard model, a model trained with AugMix, random erasing, soft random erasing, random patch mixing and self patch mixing.
